# Space-time conditional autoregressive modeling to estimate neighborhood-level risks for dengue fever in Cali, Colombia

Desjardins, M.R.<sup>1\*</sup>, Eastin, M.D.<sup>2</sup>, Paul, R.<sup>3</sup>, Casas, I.<sup>4</sup>, & Delmelle, E.M.<sup>2</sup>

<sup>1</sup>Spatial Science for Public Health Center, Department of Epidemiology, Johns Hopkins Bloomberg School of Public Health, Baltimore, MD, 21205

<sup>2</sup>Department of Geography and Earth Sciences & Center for Applied Geographic Information Science. University of North Carolina at Charlotte, Charlotte, NC 28223

<sup>3</sup>Department of Public Health Sciences, University of North Carolina at Charlotte, Charlotte, NC 28223

<sup>4</sup>Louisiana Tech University, School of History and Social Sciences, Ruston, LA 71272

\*Corresponding author: mdesjar3@jh.edu; +1 (203) 233-5381; 627 N. Washington St., Baltimore, MD, 21205

## Abstract.

Vector-borne diseases (VBDs) affect more than 1 billion people a year worldwide, cause over 1 million deaths, and cost hundreds of billions of dollars in societal costs. Mosquitoes are the most common vectors, responsible for transmitting a variety of arboviruses. Dengue fever (DENV) has been responsible for nearly 400 million infections annually. Dengue fever is primarily transmitted by female *Aedes aegypti* and *Aedes albopictus* mosquitoes. Since both *Aedes* species are peri-domestic and container-breeding mosquitoes, dengue surveillance should begin at the local level - where a variety of local factors may increase the risk of transmission. Dengue has been endemic in Colombia for decades and is notably hyperendemic in the city of Cali. For this study, we use weekly cases of DENV in Cali, Colombia from 2015-2016; and develop space-time conditional autoregressive models to quantify how DENV risk is influenced by socioeconomic, environmental, and accessibility risk factors, and lagged weather variables. Our models identify high-risk neighborhoods for DENV throughout Cali. Statistical inference is drawn under Bayesian paradigm using Markov Chain Monte Carlo techniques. The results provide detailed insight about the spatial heterogeneity of DENV risk and the associated risk factors (such as weather, proximity to *Aedes* habitats, and socioeconomic classification) at a fine-level, informing public health officials to motivate at-risk neighborhoods to take an active role in vector surveillance and control, and improving educational and surveillance resources throughout the city of Cali.

**Keywords:** Space-time modeling, spatial epidemiology, vector-borne disease, urban health

**Funding:** This research was funded by a 2019 American Association of Geographers (AAG) Dissertation Research Grant and a 2019 UNC-Charlotte Graduate School Summer Fellowship.

## 46 **1. Introduction**

47 Vector-borne diseases, more specifically mosquito-borne arboviruses are responsible for  
48 1 billion infectious disease cases each year, globally<sup>1,2</sup>. Mosquitoes transmit a variety of  
49 arboviruses and are the most common vectors. Dengue fever (DENV) is a mosquito-borne  
50 disease that is responsible for the majority of the global burden of arboviruses<sup>3</sup>. Over 40% of  
51 humans are at risk of transmission, with incidence rising 30-fold in the last 50 years; and it is  
52 estimated that there are approximately 390 million DENV infections annually<sup>4</sup>. DENV is  
53 primarily transmitted by the *Aedes aegypti* and *Aedes albopictus* mosquitoes<sup>5,6</sup>. Both species are  
54 container-breeding mosquitoes that have become prolific in urban areas due to the widespread  
55 availability of breeding habitats<sup>7</sup>.

56 Dengue is a flavivirus that causes DENV and there are four serotypes that follow the  
57 human cycle<sup>8</sup>. The incubation period ranges from 3-14 days after being bit by an infected  
58 mosquito, and symptoms can last from 2-7 days<sup>9</sup>, however, approximately 80% of infected  
59 individuals are asymptomatic. Infection from one serotype will result in lifelong immunity to  
60 that serotype, however, secondary infection with another serotype can lead to severe forms of  
61 DENV<sup>10</sup>, such as dengue hemorrhagic fever (DHF) and dengue shock syndrome (DSS). DHF  
62 and DSS primarily affects pediatric patients, but it has also been found among adults (especially  
63 the elderly); and mortality from dengue is highest among children and those who have  
64 experienced DSS<sup>11</sup>.

65 It is critical to implement surveillance strategies that can improve the understanding of  
66 DENV transmission. Improving DENV surveillance can facilitate the timely reporting of disease  
67 cases, reduce underreporting, inform policymakers, increase disease awareness, define funding  
68 and research priorities<sup>12</sup>; ultimately reducing the economic and public health burden in at-risk

69 locations around the world<sup>13</sup>. Approaches and advances in geographic information science  
70 (GIScience) and spatial epidemiology play critical roles in DENF surveillance – such as tracking  
71 diffusion and cyclic patterns, detecting clusters and mapping disease rates and risk<sup>14</sup> and  
72 understanding the place-based determinants of disease transmission<sup>15</sup>. DENF risks and rates will  
73 vary by place and covariate data are needed to identify significant variables responsible for  
74 observable spatial patterns<sup>16</sup>.

75 Therefore, it is critical to examine the social, economic, environmental, biological, and  
76 institutional factors that may affect DENF prevalence in a particular area. Urban regions are  
77 highly complex, and neighborhoods are the scale that public health departments most effectively  
78 operate<sup>17</sup>. Therefore, more small-area studies in spatial epidemiology are required to effectively  
79 uncover the spatial and temporal heterogeneity of DENF rates across urban landscapes at these  
80 fine levels of granularity. For example, education, income, age, access to care, and quality of  
81 prevention strategies are known to strongly influence an individual's susceptibility to VBDs<sup>18,19</sup>.  
82 Likewise, the dynamics of how temperature, precipitation, and humidity affect vector abundance  
83 and DENF transmission are critical to developing and implementing effective sub-seasonal risk  
84 model<sup>20</sup> and long-term mitigation in response to climate change<sup>21</sup>.

85 Conditional autoregressive (CAR) models can be utilized to examine how DENF risk is  
86 influenced by socioeconomic, environmental, and accessibility risk factors, and lagged weather  
87 variables. For example, a particular location may be influenced by DENF rates and a variety of  
88 explanatory variables (e.g. socioeconomic status, proximity to *Aedes* habitats, etc.) contained in  
89 surrounding locations (spatial spillover/diffusion effects). CAR models can be fitted to data  
90 under Bayesian paradigm (i.e. relying on prior beliefs/borrowing information to inform future  
91 estimations) using – Bayesian hierarchical models (BHM), which are widely used techniques in

92 geography and public health to model spatial and spatiotemporal data<sup>22</sup>. In short, BHMs can  
93 model complicated spatial and space-time processes by conditionally modeling the variations in  
94 data, the process, and unknown parameter<sup>23</sup>. The temporal extension – ST-CAR can estimate the  
95 value of a variable (e.g. disease rates) at a particular location and time, which will be related to  
96 current and past values of the surrounding locations and time periods; essentially testing for  
97 spatiotemporal dependence. ST-CAR models have been used to study the effect of air pollution  
98 on human health<sup>24</sup>, substance abuse and its relationship with child abuse<sup>25</sup>, influenza<sup>26</sup>, and  
99 DENF<sup>27,28,29</sup>.

100 More research is necessary to examine the local variations in DENF transmission  
101 dynamics at very fine spatial and temporal scales. Delmelle et al. (2016)<sup>30</sup> used a geographically  
102 weighted regression (GWR<sup>31</sup>) model which identified six significant socioeconomic and  
103 environmental independent variables (including proximity to tire shops and population density)  
104 of DENF rates in Cali, Colombia at the neighborhood-level. However, the explanatory power of  
105 GWR and its temporal extension – GTWR<sup>32</sup>), is limited. Both CAR and ST-CAR models  
106 produce model-based estimates and inference derived from varying effects via spatial random  
107 fields – e.g. borrowing strength from neighborhood spatial and temporal proximity; while GWR  
108 models allow the covariates to vary in space (and time in the case of GTWR), but inference is ad  
109 hoc. In other words, ST-CAR models can estimate spatially and temporally varying associations  
110 between the dependent (e.g. disease rates) and independent variables based on locally weighted  
111 regressions in both geographic and attribute space; while GTWR can only produce local  
112 estimates in geographic space. It is therefore worthwhile to utilize ST-CAR modeling in small-  
113 area DENF studies at fine temporal scales.

114 This study utilizes a ST-CAR modeling approach to examine the influence of  
115 socioeconomic, environmental, weather and climate variables on DENF outbreaks in Cali,  
116 Colombia at the neighborhood- and weekly levels between 2015 and 2016. The approach can  
117 determine if DENF rates and covariates in one neighborhood are influenced by rates and  
118 covariates in surrounding neighborhoods and time periods. We also estimate disease risks using  
119 temporally lagged weather variables. Our modeling approach is capable of identifying regions  
120 with high risk clusters at the neighborhood-level. The results provide detailed insight about the  
121 spatial heterogeneity of disease risk and the associated risk factors at a fine-level; informing  
122 public health officials to motivate at-risk neighborhoods to take an active role in vector  
123 surveillance and control, and improving educational and surveillance resources throughout the  
124 city of Cali.

125 The remainder of this paper is as follows: section 2 provides information about Cali, the  
126 DENF cases, and candidate independent variables, the technique to select the lagged weather  
127 variables, and the ST-CAR modeling approach. Section 3 provides the modeling results,  
128 including maps of the estimated DENF rates by week for each neighborhood in Cali. Section 4  
129 discusses key findings, strengths, limitations, and avenues of future research; and section 5  
130 summarizes findings with concluding remarks.

## 131 **2. Data & Methods**

### 132 **2.1 Study Area & Data**

133 Cali is the second-largest city in Colombia and third most populous with an estimated  
134 2010 population of 2.3 million (average density of 4,000 km<sup>2</sup>). The city is comprised of 340  
135 neighborhoods (Spanish - barrios), which are classified by socioeconomic stratum (ranging from  
136 1-6); where a ranking of 1-2 is low, 3-4 is middle, and 5-6 is high. The classifications are

137 defined by the external physical characteristics of the dwelling, its immediate surroundings, and  
138 its urban context. For example, urban context includes variables such as poverty, social  
139 deviation, urban decay, industry, commercial; immediate surroundings include access roads,  
140 sidewalks; and the characteristics of the dwelling include front lawn, garage, façade material,  
141 door material, front of the house dimensions, and windows (income is not considered). This  
142 stratification is only applied to residential constructions<sup>33</sup>. Figure 1 provides a map of  
143 neighborhoods in Cali and their corresponding ranking. The average size of neighborhoods in  
144 Cali is 0.35 square kilometers. Some of the smaller neighborhoods are in the city core, which is  
145 where the city was founded. The largest neighborhood is to the south and corresponds to newer  
146 developments and is an area that houses three of the largest universities in Cali.

147 Individual cases of DENF for the years of 2015 and 2016 at the weekly level were used  
148 (Figure 2 - top), which were provided by Colombia's National Institute of Health. Between 2015  
149 and 2016, Cali experienced three major outbreaks: March to mid-May 2015; February to early-  
150 April 2016; and mid-June 2016 to early August 2016 (represented by the peaks in Figure 2 - top).  
151 The cases were geocoded to the neighborhood level using each neighborhood's name as the  
152 address locator in the geocoder algorithm in ArcGIS 10.6 (ESRI, Redlands, CA) Each DENF  
153 case record contained a neighborhood where the infected individual lived (individual addresses  
154 were not available), then the geocoder aggregated the cases to a particular neighborhood after a  
155 successful match. As a result, 26,503 out of 35,498 DENF cases (74.6%) were successfully  
156 geocoded and aggregated to the neighborhood-level in Cali. Cases that were not geocoded did  
157 not have an address nor a neighborhood, therefore, it was impossible to assign coordinates to the  
158 unmatched cases.

159 Figure 2 (bottom) provides a map of the total DENF cases per neighborhood between  
160 2015 and 2016 in Cali. The eastern portion of Cali observed the highest number of DENF cases  
161 between the two years in our study period. These neighborhoods were majority low strata (1 and  
162 2); however, there are numerous middle strata (3 and 4) neighborhoods in the central and  
163 southern portions of Cali with a high number of DENF cases. There are also high strata  
164 neighborhoods with a high proportion of cases in the central and western regions of Cali,  
165 especially those that are adjacent to lower strata neighborhoods.

166 **[Insert] Figure 1. Neighborhoods in Cali, Colombia and their ranking by socioeconomic**  
167 **strata (1-6).**

168 **[Insert] Figure 2. Temporal distribution of weekly DENF cases in Cali from January 2015**  
169 **through December 2016 (top); spatial distribution of DENF rates per 1,000 for the study**  
170 **period (bottom).**

171 The socioeconomic and demographic data were provided by the Colombian census  
172 (either 2005 or 2010 estimates provided by the City of Cali), including population density, age,  
173 race, households with sewer and water access, educational attainment, employment status,  
174 socioeconomic stratum, among others. The last national census occurred in 2005, while the new  
175 2018 census has yet to be released. The location of healthcare centers and the environmental  
176 variables were provided by the city of Cali (2010 data) – green zones, rivers, tire shops, water  
177 pumps, cemeteries, and plant nurseries, which were geocoded as point layers with the exception  
178 of green zones (area - polygons) and rivers (lines). The environmental variables are included as  
179 potential *Aedes* habitats. For green zones, the area of the green zones for each neighborhood was  
180 computed in square-kilometers. Similar to Delmelle et al. (2016)<sup>30</sup>, relative proximity to rivers,  
181 tire shops, water pumps, cemeteries, plant nurseries, and healthcare centers was computed by  
182 using kernel density estimation (KDE) – representing the density of points for each layer. KDE

183 was also computed to produce the density of trees. Zonal statistics in ArcGIS 10.6 was used to  
184 summarize the average KDE for each neighborhood in Cali.

185 Finally, the weather variables selected for evaluation (Table 1) are consistent with current  
186 understanding of how weather conditions impact *Aedes* survival, abundance, and behavior,  
187 including viral transmission rates<sup>34,20</sup> (Table 5). Given our goal of developing a risk model using  
188 2015-16 weekly-level DENF data, the weather variables entail weekly summaries of 2014-16  
189 daily meteorological observations collected at the Cali international airport and obtained from  
190 the Global Historical Climate Network archive<sup>35</sup> maintained by the National Centers for  
191 Environmental Information (<http://www.ncdc.noaa.gov>). All weekly weather variables were  
192 computed following the methods outlined in Eastin et al. (2014)<sup>20</sup>, and summary statistics for the  
193 2014-16 period are provided in Table 1. A total of 49 candidate predictor variables of DENF  
194 were evaluated in this study (Table 1). Due to the differences in units of measurements, each  
195 variable was normalized between 0 and 1 (i.e., between the maximum and minimum values  
196 listed in Table 1) for all subsequent analyses.

197

198

199

200

201

202

203

204

205



206 **Table 1: Descriptive Statistics of the Candidate Independent Variables for Cali, Colombia**  
 207 **(# \*Mean; \*\*Median; Total\*\*\*)**

| Variable ID                            | Variable Name                                       | Year      | Source       | Value#     | Range       |
|----------------------------------------|-----------------------------------------------------|-----------|--------------|------------|-------------|
| <b>Environmental/Aedes Habitats</b>    |                                                     |           |              |            |             |
| Green                                  | Area of green zones (km <sup>2</sup> )              | 2010      | City of Cali | 196.4***   | 0-34.9      |
| Rivers                                 | Relative proximity to river                         | 2010      | City of Cali | 1082.0     | 0-9,3539.3  |
| Tires                                  | Relative proximity to tire shops                    | 2010      | City of Cali | 5.1*       | 0-28.6      |
| WPumps                                 | Relative proximity to water pumps                   | 2010      | City of Cali | 0.1*       | 0-0.5       |
| Cemet                                  | Relative proximity to cemeteries                    | 2010      | City of Cali | 2.1*       | 0-9.8       |
| PNurseries                             | Relative proximity to plant nurseries               | 2010      | City of Cali | 0.5*       | 0-1.9       |
| Trees                                  | Density of trees (km <sup>2</sup> )                 | 2010      | City of Cali | 1,698.9*** | 8.6-6,355.6 |
| <b>Healthcare Accessibility</b>        |                                                     |           |              |            |             |
| DistHealth                             | Relative proximity to a healthcare center           | 2010      | City of Cali | 4.4*       | 0-9.2       |
| HealthAvg                              | Mean healthcare center density (km <sup>2</sup> )   | 2010      | City of Cali | 4.2*       | 0-74.4      |
| <b>Socioeconomic &amp; Demographic</b> |                                                     |           |              |            |             |
| Strata                                 | Neighborhood Stratum                                | 2010      | Census       | 3**        | 1-6         |
| Popdens                                | Population density (km <sup>2</sup> )               | 2005      | Census       | 22,099*    | 0-56,814    |
| %OHH                                   | Density of occupied households (km <sup>2</sup> )   | 2005      | Census       | 837.2*     | 0-14,885    |
| %UHH                                   | Density of unoccupied households (km <sup>2</sup> ) | 2005      | Census       | 98.6*      | 0-688.4     |
| %Sew                                   | Households with sewer (%)                           | 2005      | Census       | 89.8*      | 0-100       |
| %Water                                 | Households with water (%)                           | 2005      | Census       | 90.2*      | 0-100       |
| %A04                                   | Individual age 0-4 years old (%)                    | 2005      | Census       | 7.3*       | 0-15.7      |
| %A514                                  | Individual age 5-14 years old (%)                   | 2005      | Census       | 17.2*      | 0-27.8      |
| %A1524                                 | Individual age 15-24 years old (%)                  | 2005      | Census       | 17.5*      | 0-69.2      |
| %A2539                                 | Individual age 25-39 years old (%)                  | 2005      | Census       | 23.4*      | 0-39.1      |
| %A4064                                 | Individual age 40-64 years old (%)                  | 2005      | Census       | 26.3*      | 0-47.8      |
| %A65                                   | Individual age 65 years old or more (%)             | 2005      | Census       | 8.3*       | 0-23.4      |
| %Fem                                   | Female population (%)                               | 2005      | Census       | 53.4*      | 0-100       |
| %White                                 | White population (%)                                | 2005      | Census       | 77.2*      | 0-96.7      |
| %Black                                 | Black population (%)                                | 2005      | Census       | 22.1*      | 0-70.6      |
| %Indig                                 | Indigenous population (%)                           | 2005      | Census       | 0.5*       | 0-8.7       |
| %Disabled                              | Individuals with disabilities (%)                   | 2005      | Census       | 1.1*       | 0-5.7       |
| %NoRW                                  | Individuals who cannot read/write (%)               | 2005      | Census       | 6.8*       | 0-5.7       |
| %NoEduc                                | Individuals with no education (%)                   | 2005      | Census       | 3.6*       | 0-16.8      |
| %LowEduc                               | Individuals with low education (%)                  | 2005      | Census       | 26.9*      | 0-52.8      |
| %MedEduc                               | Individuals with medium education (%)               | 2005      | Census       | 49.6*      | 0-71.3      |
| %HighEduc                              | Individuals with high education (%)                 | 2005      | Census       | 19.9*      | 0-56.0      |
| %Work                                  | Employed individuals (%)                            | 2005      | Census       | 41.1*      | 0-58.9      |
| %Unem                                  | Unemployed individuals (%)                          | 2005      | Census       | 1.5*       | 0-10.3      |
| %Retired                               | Retired individuals (%)                             | 2005      | Census       | 3.9*       | 0-15.9      |
| %HW                                    | Individuals doing housework (%)                     | 2005      | Census       | 13.6*      | 0-18        |
| %Students                              | Students (%)                                        | 2005      | Census       | 22.9*      | 0-36.8      |
| %Married                               | Married individuals (%)                             | 2005      | Census       | 19.0*      | 0-37.9      |
| %Single                                | Single individuals (%)                              | 2005      | Census       | 38.9*      | 0-100       |
| <b>Weather (Weekly Observations)</b>   |                                                     |           |              |            |             |
| Tavg                                   | Mean Temperature of (°C)                            | 2014-2016 | City of Cali | 24.2*      | 22.5-25.7   |
| Tmax                                   | Mean Maximum Temperature (°C)                       | 2014-2016 | City of Cali | 31.2*      | 28.5-34.2   |
| Tmin                                   | Mean Minimum Temperature (°C)                       | 2014-2016 | City of Cali | 19.4*      | 17.2-20.7   |
| DTRavg                                 | Mean Daily Temperature Range (°C)                   | 2014-2016 | City of Cali | 11.8*      | 9-15.7      |
| DTRmax                                 | Maximum Daily Temperature Range (°C)                | 2014-2016 | City of Cali | 14.3*      | 10.6-21     |
| RHavg                                  | Mean Relative Humidity (%)                          | 2014-2016 | City of Cali | 73.3*      | 63.9-83.7   |
| RHrng                                  | Relative Humidity Range (%)                         | 2014-2016 | City of Cali | 10.6*      | 2.7-24.1    |
| RainT                                  | Total Rain (mm)                                     | 2014-2016 | City of Cali | 12.3*      | 0-103       |
| RainD                                  | Total Days with Measurable Rainfall                 | 2014-2016 | City of Cali | 2.8*       | 0-7         |
| CoolD                                  | Days with Minimum Temperature < 18 (°C)             | 2014-2016 | City of Cali | 0.6*       | 0-5         |
| WarmD                                  | Days with Maximum Temperature > 32 (°C)             | 2014-2016 | City of Cali | 2.0*       | 0-7         |

## 209 2.2 Methodology

### 210 2.2.1 Principal component analysis & VIF testing

211 Due to the large number of socioeconomic, demographic variables, and environmental  
212 variables ( $n = 36$ ), we utilized Variance Inflation Factor (VIF)<sup>36</sup> testing and a principal  
213 component analysis (PCA<sup>37</sup>) in Stata. We did not include all variables in the PCA because we  
214 wanted to interpret particular independent variables of DENF individually, which is important  
215 for potential decision-making. For example, identifying the effects of individual *Aedes* habitats  
216 (e.g. tire shops and trees) can provide more intuitive results than grouping them in a PCA. As a  
217 result five variables were selected for subsequent modeling with a VIF value  $< 3$ : population  
218 density, tree density, relative proximity to rivers, relative proximity to tire shops, and relative  
219 proximity to plant nurseries.

220 The PCA's purpose is to reduce and simplify the variables into new variable  
221 (components) that explain a large degree of variation without collinearity between the  
222 components. Tables 2 and 3 provide the results of the PCA analysis and include the variables  
223 that were included – which were not included in the VIF testing. Table 2 describes the variance  
224 explained by the top three principal components and Table 3 shows the variables that belong to  
225 each component. After examining the eigenvalues and component loadings with coefficients  $>$   
226 0.40, the first two components were selected for inclusion in the space-time modeling, which  
227 explains 60.8% of the variance (42% and 18.8%, respectively).

228 PC1 is strongly associated with (correlation close to 0.5 and above) neighborhood strata,  
229 individuals who are employed, retired persons, married individuals, empty households, and  
230 individuals with high education. PC2 mainly explains occupied households, individuals who do  
231 housework, and individuals who are students. PC3 explains the combined effect from disabled  
232 individuals but was excluded from further analysis and it was included as a separate variable in

233 further VIF (variance inflation factor) testing with the remaining covariates. PC1 can be  
234 interpreted as employed, higher-income people who are likely to be older and married due to the  
235 large coefficients of retired and married individuals. PC2 can be interpreted as people who are  
236 likely to spend more time at home than those in PC1 because they are either students or do  
237 housework for a living. PC2 probably also captures younger individuals due to the inclusion of  
238 students.

239 **Table 2. Explained variance by top three principal components**

| Component | Extraction Sums of Squared Loadings |          |              | Rotation Sums of Squared Loadings |               |
|-----------|-------------------------------------|----------|--------------|-----------------------------------|---------------|
|           | Total                               | Variance | Cumulative % | Total                             | % of Variance |
| 1         | 4.516                               | 45.163   | 45.163       | 4.203                             | 42.032        |
| 2         | 1.703                               | 17.031   | 62.194       | 1.882                             | 18.817        |
| 3         | 1.072                               | 10.719   | 72.912       | 1.206                             | 12.064        |

240

241

**Table 3. Rotated component loadings with coefficient > 0.40**

| Variable     | Component |      |       |
|--------------|-----------|------|-------|
|              | 1         | 2    | 3     |
| Strata*      | .856      |      |       |
| % OHH**      |           | .749 |       |
| % HW**       |           | .657 |       |
| % Work**     | .784      |      |       |
| % Retired**  | .781      |      |       |
| % Disabled** |           |      | .782  |
| % Student**  |           | .873 |       |
| % Married**  | .941      |      |       |
| % EmptyHH**  | .484      |      | -.514 |
| % HighEduc** | .940      |      |       |

\*Neighborhood strata classification between 1 and 6.

\*\*proportion (%) of individuals in each category: (1) Occupied Households (2) Work from Home (3) Retired persons (4) Disabled persons (5) Students (6) Married persons (7) Empty Households (8) holds college degree or higher

## 242 2.2.2 Selecting Lagged Weather Variables

243 First, VIF testing was used to assess multicollinearity among the candidate weekly  
244 weather variables (Table 1) and remove the most inter-correlated variables while retaining the  
245 most independent. Seven variables (with VIF values < 3) were selected for the subsequent cross-  
246 correlation analysis: Tavg, DTRmax, RHrng, RainT, RainD, CoolD, and WarmD. Next, lagged  
247 cross-correlations were computed between weekly DENF rates and each weather variable over  
248 an 8-week window (Table 4). Such time frame was considered the most biologically plausible  
249 based on existing literature of how weather affects the full vector lifecycle and viral transmission  
250 dynamics<sup>20,34</sup> (see Table 5). Finally, an optimal lag for each weather variable was selected  
251 among those weeks exhibiting a statistically significant (at the 5% level; adjusted for multiple  
252 testing) cross-correlation within the 1-8 week lag window (0-week lags were not considered due  
253 to their lack of predictive potential). For six variables (Tavg, DTRmax, RainT, RainD, CoolD,  
254 WarmD), the selected optimal lags (5-weeks, 5-weeks, 3-weeks, 5-weeks, 2-weeks, 5-weeks,  
255 respectively) exhibited the maximum cross-correlation coefficient (Table 4). For RHrng, the  
256 maximum correlation occurred at 6-weeks, but the 3-week lag was deemed optimal since  
257 existing literature suggests that relative humidity is most influential on adult vectors and the  
258 gonotrophic cycle (Table 5). The optimal lags were included in the ST-CAR models.

259

260

261

262

263

**Table 4. Lagged cross-correlations between DENF rates and weekly weather variables during**

### 2015-2016 in Cali, Colombia

| Lag (Weeks) | Tavg    | RainT    | RHrng    | DTRmax  | RainD    | CoolD    | WarmD   |
|-------------|---------|----------|----------|---------|----------|----------|---------|
| 0           | 0.419*  | -0.207   | -0.012   | 0.463*  | -0.508*  | 0.202    | 0.507*  |
| -1          | 0.285*  | -0.413*  | -0.057   | 0.150   | 0.011    | -0.109   | 0.261*  |
| -2          | 0.032   | 0.098    | 0.212    | 0.077   | 0.337*   | -0.354** | 0.095   |
| -3          | 0.074   | -0.458** | -0.448** | 0.029   | -0.012   | -0.166   | -0.012  |
| -4          | 0.257*  | -0.092   | -0.166   | 0.105   | -0.488*  | 0.081    | 0.201   |
| -5          | 0.369** | -0.262*  | -0.362*  | 0.236** | -0.542** | 0.201    | 0.287** |
| -6          | 0.255*  | -0.316*  | -0.557*  | -0.104  | -0.359*  | 0.304*   | 0.014   |
| -7          | 0.221   | -0.011   | -0.473*  | 0.079   | -0.338*  | 0.283*   | -0.047  |
| -8          | 0.242   | -0.315*  | -0.098   | -0.088  | -0.309*  | 0.181    | -0.156  |

\*Significant at the 5% level (after adjustment via a Bonferroni correction for multiple testing)

\*\*Selected Lag for ST-CAR modeling

264

265

266

267

268

269

270

271

272

273

274

275

276

277

278  
279

**Table 5. Temporally-lagged weather variables & correlation with *Aedes*' life cycle (\*Based on 20, 34); #Total lag (weeks prior to lab confirmation) - accumulated range for each stage in the vector-dengue transmission cycle**

| Development Stage                                         | Range (Days) * | Total Lag (Weeks) # | Variable | Expected Relation | Rationale                                                                                    | Primary Sources |
|-----------------------------------------------------------|----------------|---------------------|----------|-------------------|----------------------------------------------------------------------------------------------|-----------------|
| <b>Larval/Pupa Development</b><br>(vector grows in water) | 10-21          | 3-8                 | RainT    | Positive          | More total rain produces more stagnant pools; promotes larval development                    | 38, 39          |
|                                                           |                |                     | RainD    | Positive          | More frequent rain produces more stagnant pools; promotes larval development                 | 40, 41          |
|                                                           |                |                     | Tavg     | Positive          | Warmer temperatures promote larval development                                               | 42, 43          |
|                                                           |                |                     | DTRmax   | Negative          | Smaller ranges imply fewer hours with cold temperatures; greater larval survival             | 20, 44          |
|                                                           |                |                     | RHrng    | Negative          | Smaller ranges imply fewer dry days; stagnant pools quickly evaporate                        | 20, 45          |
|                                                           |                |                     | WarmD    | Positive          | More warmer days promote greater larval densities                                            | 44, 46          |
|                                                           |                |                     | CoolD    | Negative          | Fewer cold days promote greater larval survival                                              | 44, 46          |
| <b>Gonotrophic Cycle</b><br>(vectors feed on humans)      | 3-7            | 2-5                 | RainT    | Negative          | Rainfall tends to coincide with cooler temperatures; less vector feeding                     | 20, 47          |
|                                                           |                |                     | RainD    | Negative          | Rainfall tends to coincide with cooler temperatures; less vector feeding                     | 20, 47          |
|                                                           |                |                     | Tavg     | Positive          | Vector feeding more frequent at warmer temperatures                                          | 48, 49          |
|                                                           |                |                     | DTRmax   | Negative          | Vector feeding more frequent at warmer temperatures; smaller DTRmax implies fewer cold hours | 20, 42          |
|                                                           |                |                     | RHrng    | Positive          | Vector feeding more frequent during dry periods; larger RHrng implies more dry days          | 20, 45          |
|                                                           |                |                     | WarmD    | Positive          | Vector feeding more frequent at warmer temperatures                                          | 50              |
|                                                           |                |                     | CoolD    | Negative          | Vector feeding more frequent at warmer temperatures; fewer cold hours                        | 50              |
| <b>Extrinsic Incubation</b><br>(virus matures in vector)  | 7-15           | 1-4                 | RainT    | Unknown           | No known link between rainfall and extrinsic incubation                                      | N/A             |
|                                                           |                |                     | RainD    | Unknown           | No known link between rainfall and extrinsic incubation                                      | N/A             |
|                                                           |                |                     | Tavg     | Positive          | Viral development more rapid at warmer temperatures                                          | 48, 51          |
|                                                           |                |                     | DTRmax   | Negative          | Viral development more rapid at warmer temperatures; smaller DTRmax implies fewer cold hours | 50              |
|                                                           |                |                     | RHrng    | Positive          | Viral development more rapid in humid environments; smaller RHrng implies fewer dry days     | 52, 53          |
|                                                           |                |                     | WarmD    | Positive          | Viral development more rapid at warmer temperatures                                          | 50              |
|                                                           |                |                     | CoolD    | Negative          | Viral development more rapid at warmer temperatures; fewer cold hours                        | 50              |
| <b>Intrinsic Incubation</b><br>(virus matures in humans)  | 1-12           | 0-2                 | N/A      | N/A               | No known link between weather and intrinsic incubation                                       | N/A             |
| <b>Dengue Reported</b><br>(lab confirmation)              | ---            | ---                 | N/A      | N/A               | N/A                                                                                          | N/A             |
| <b>Total</b>                                              | 21-55          | 0-8                 |          |                   |                                                                                              |                 |

### 280 2.2.3 Poisson GLMs

281 First, a Poisson generalized linear model (GLM) is computed to detect significant effects  
282 of independent variables on a dependent variable (DENF risk); and the presence of  
283 spatiotemporal autocorrelation in the residuals. The Poisson GLM is defined as:

$$Y_{ij} \sim \text{Poisson}(E_{ij}R_{ij}) \quad (1)$$

$$\begin{aligned} \log(R_{ij}) = & \beta_0 + \beta_1 PC1_i + \beta_2 PC2_i + \beta_3 PNurseries_i + \beta_4 Tires_i \\ & + \beta_5 popdens_i + \beta_6 rivers_i + \beta_7 trees_i + \beta_8 Tavg_{ij} \\ & + \beta_9 DTRMax_{ij} + \beta_{10} RHRng_{ij} + \beta_{11} RainT_{ij} + \beta_{12} RainD_{ij} \\ & + \beta_{13} CoolD_{ij} + \beta_{14} WarmD_{ij} \end{aligned} \quad (2)$$

284 where  $Y_{ij}$  is the observed DENF count in neighborhood  $i$  at week  $j$ ;  $E_{ij}$  is the expected DENF  
285 count in neighborhood  $i$  at week  $j$ ; and  $R_{ij}$  is the disease risk in neighborhood  $i$  at week  $j$  (see  
286 supplemental materials for the results of the Poisson GLM).

287 Global Moran's  $I^{54}$  was then computed to detect spatial autocorrelation of the Poisson  
288 GLM residuals for each time period. Essentially, the Global Moran's  $I$  test determines if there is  
289 evidence of unexplained spatial autocorrelation in the residuals; and if positive spatial  
290 autocorrelation is detected, then the assumption of independence is not valid for the data, and  
291 spatiotemporal autocorrelation should be considered when estimating covariate effects on the  
292 dependent variable. The global Moran's  $I$  index ranges from -1 to 1, while -1 indicates strong  
293 negative spatial autocorrelation, 0 indicates complete spatial randomness, and 1 indicates strong  
294 positive spatial autocorrelation; and the statistic is defined as:

$$I = \frac{n \sum_i \sum_l w_{il} (x_i - \bar{x})(x_l - \bar{x})}{\sum_i \sum_l w_{il} \sum (x_i - \bar{x})^2} \quad (3)$$

295 where  $n$  is the total number of neighborhoods,  $w_{il}$  is the spatial weight between neighborhood  $i$   
296 and  $l$ ,  $\bar{x}$  is the mean of residuals for all neighborhoods,  $x_i$  is the residual value in neighborhood  $i$ ,



297 and  $x_l$  is the residual in neighborhood  $l$ . The Moran's I tests were conducted in RStudio 1.2.5  
298 with R version 3.6.

#### 299 2.2.4 ST-CAR Modeling

300 Next, a Bayesian hierarchical model<sup>24,25</sup> is defined using a Poisson data model (for  
301 case/population data). The model "represents the spatio-temporal pattern in the mean response  
302 with a single set of spatially and temporally autocorrelated random effects. The effects follow a  
303 multivariate autoregressive process of order 1<sup>54</sup>. In other words, when going from one week to  
304 another (e.g.  $j + 1$ ), it will yield an effect on the dependent variable (DENF risk). Therefore, this  
305 model examines linear trends which can be interpreted as how DENF risk is influenced across  
306 time.

307 It is assumed that the estimated effect on DENF risk in the ST-CAR model is not specific  
308 to a particular week, but a process that is influenced by the covariate data across the weeks  
309 (temporal unit). Suppose a study region is divided into a collection of  $N$  non-overlapping areal  
310 units (e.g. neighborhoods) indexed by  $i \in \{1, \dots, N\}$ ; and the data is observed for multiple time  
311 periods, that is:  $j \in \{1, \dots, T\}$ . As suggested before, ST-CAR models utilize prior distributions,  
312 where the CAR distributions state that adjacent variables in space or time are conditionally  
313 autocorrelated, and non-adjacent variables are conditionally independent. The spatial weight  
314 matrix is defined as:  $W = (w_{ik})$ , where a value of 1 indicates that  $i$  and  $k$  are spatially adjacent,  
315 and 0 otherwise. Since it is unknown where a person was infected, the abovementioned  
316 adjacency matrix is a proxy for *Aedes*' maximum range – since they do not fly more than 400  
317 meters from where they emerged as larvae<sup>10</sup>. A temporal weight matrix can also be defined as  $D$   
318  $= (d_{jt})$ , where a value of 1 is given if  $t - j = 1$ , and 0 otherwise. The first part of the model is  
319 defined as:

$$Y_{ij}|E_{ij},R_{ij}\sim\text{Poisson}(E_{ij}R_{ij}) \tag{4}$$

$$\ln(R_{ij}) = X_{ij}^T\beta + O_{ij} + \phi_{ij} \tag{5}$$

$$\beta_k \sim N(0, 1000) \quad k \in \{1, \dots, p\}, \tag{6}$$

320 where  $Y_{ij}$  is the observed DENF count in neighborhood  $i$  at week  $j$ ;  $E_{ij}$  is the expected disease  
321 count in neighborhood  $i$  at week  $j$ ; and  $R_{ij}$  is the disease risk in neighborhood  $i$  at week  $j$ .  $X_{ij}^T$   
322  $(x_{ij1}, \dots, x_{ijp})$  is a vector of known covariates  $p$  for neighborhood  $i$  and week  $j$ . The parameter  $\beta$   
323 is an associated  $p \times 1$  vector of regression parameters, which can come from the initial Poisson  
324 GLM in Equations 1 and 2. The term  $O$  is a vector of known offsets  $(O_1, \dots, O_N)_{K \times N}$ , where  
325  $O_j$  is a  $K \times 1$  column vector of offsets (expected DENF cases) for week  $j$   $(O_{1j}, \dots, O_{Kj})$ . An  
326 offset variable is used to scale the modeling of the mean in Poisson regression with a log link,  
327 which is the case in the above model. For example, since the dependent variable is rates, the  
328 offset can enforce that 10 cases of DENF in one week is not the same magnitude as 10 cases of  
329 DENF in 6 weeks. The parameter  $\phi_{ij}$  denotes spatiotemporally autocorrelated random effects for  
330 neighborhood  $i$  and week  $j$ . A variety of spatiotemporal structures can be fit for  $\phi_{ij}$ . Here, we  
331 use a model that estimates the evolution of the spatial response surface over time without forcing  
332 it to be the same for each time period (Rushworth et al. 2014).

$$f(\phi_1, \dots, \phi_T) \sim f(\phi_1) \prod_{j=2}^T f(\phi_j | \phi_{j-1}) \tag{7}$$

333 Where  $\phi_j = (\phi_{1j}, \dots, \phi_{Nj})$  is a vector of random effects for week  $j$ . Temporal autocorrelation is  
 334 enforced because  $\phi_j$  depends on  $\phi_{j-1}$ .  $f(\phi_1)$  enforces spatial autocorrelation in the random  
 335 effects, where the spatial structure is defined in the CAR prior in Equation 8:

$$\phi_{i1} | \phi_{-i} \sim N\left(\frac{\rho \sum_{k=1}^N w_{ik} \phi_{k1}}{\rho \sum_{k=1}^N w_{ik} + 1 - \rho}, \frac{\tau^2}{\rho \sum_{k=1}^N w_{ik} + 1 - \rho}\right) \quad (8)$$

336 Where  $\rho$  controls the spatial autocorrelation with  $\rho = 1$  indicating strong spatial autocorrelation,  
 337 which is conditional upon the mean random effects of adjacent neighborhoods.  $\rho = 0$  represents  
 338 independent random effects with a constant mean and constant variance. The conditional  
 339 precision is controlled by  $\tau$ , where precision is higher when more prior information (e.g. adjacent  
 340 neighborhoods) is borrowed to determine the posterior estimates. Equation 9 (CAR Prior)  
 341 enforces temporal autocorrelation in the random effects and is defined as:

$$\phi_j | \phi_{j-1} \sim N(\alpha \phi_{j-1}, \tau^2 Q(\rho, W)^{-1}) \quad j \in \{2, \dots, T\}, \quad (9)$$

342 Where  $Q(\rho, W)$  is a precision matrix, that is defined as  $\rho(\text{diagonal}(W1) - W) + (1 - \rho)I$ , where  $I$   
 343 is a  $N \times N$  identity matrix and the '1' is a vector of ones ( $N \times 1$ ). The  $\alpha$  controls the temporal  
 344 autocorrelation, where 0 is temporally independent and 1 is strong temporal dependence. The  
 345 CAR priors also include weakly informative hyperpriors (i.e. probability distribution from priors  
 346 to inform/update posterior values), which are the three parameters defined below:

$$\begin{aligned} 347 \quad & \tau \sim \text{Uniform} [0, 1000], \\ 348 \quad & \alpha \sim \text{Uniform} [0, 1], \\ 349 \quad & \rho \sim \text{Uniform} [0, 1] \end{aligned}$$

350 The values of the hyperpriors are selected in a way so that our Bayesian inferences are robust  
 351 and not sensitive to these choices. For example, a non-stationary spatial process would occur  
 352 when  $\rho = 1$ ; and non-stationary temporal process would occur if  $\alpha = 1$ . Overall, the ST-CAR

353 model states that when going from one week to another ( $j + 1$ ), it yields an effect on the  
354 dependent variable (DENF risk), which is influenced by spatially and temporally dependent  
355 covariates. In other words, DENF risk in a target neighborhood is influenced by current and past  
356 values of DENF risk and covariates at surrounding neighborhoods and time periods (which is a  
357 process that evolves over time). Conceptually, a spatial example would suggest that a  
358 neighborhood with low risk of DENF would have an increased risk of DENF if an adjacent  
359 neighborhood reported a high risk of DENF (dependence/autocorrelation).

360 Statistical inference is derived from Markov Chain Monte Carlo (MCMC) simulations<sup>56</sup>.  
361 MCMC is a popular technique for Bayesian inference when posterior distributions are not  
362 available in closed forms. We used MCMC to generate samples from the posterior distributions  
363 induced by our ST-CAR models and used them for parameter and density estimation. For this  
364 study, we selected 220,000 MCMC samples; initial 20,000 samples are removed as burn-in; and  
365 the thinning parameter is set to 10 (keeping every 10<sup>th</sup> value and removing all others), which  
366 thins the samples to reduce autocorrelation of the Markov Chain. As a result, 20,000 samples are  
367 used for statistical inference. The deviance information criterion (DIC) was used for model  
368 assessment and comparison, where lower values of DIC indicate a better model fit. The results  
369 of two models are presented in section 3: Model 1 (DENF with no lags); Model 2 (DENF with  
370 lagged weather variables). Using CARBayesST<sup>24</sup> in R, the two Poisson GLM models (DENF  
371 with no lags; DENF with lags) were each fitted to the ST-CAR model described above.

## 372 **3. Results**

### 373 3.1 ST-CAR Results

374           The following subsections contain summaries of model results; relative risk estimates for  
375 each independent variable; and mapping the posterior estimates of DENF rates in Cali for  
376 particular time periods (temporal cross-sections).

### 377 3.1.1 Model 1

378           Table 6 (left) summarizes the results of Model 1 (DENF with no lags). The 95% credible  
379 intervals do not contain a value of 0, indicating that all the covariates exhibit influential  
380 relationships with DENF risk at the neighborhood level in Cali between January 2015 and  
381 December 2016. The spatial autocorrelation value of 0.98 indicates that there is very strong  
382 spatial dependence of the data after adjusting for covariate effects. The temporal autocorrelation  
383 value of 0.11 suggests that there is some presence of temporal dependence of the data after  
384 adjusting for covariate effects. Therefore, DENF risk in Cali at the neighborhood level is  
385 influenced by DENF rates and covariates in surrounding neighborhoods and time periods  
386 (weeks). Table 6 (left) also shows the relative risk estimates (%) of DENF in Cali between  
387 January 2015 and December 2016. The results suggest a 4.7% increase in DENF risk for PC1; a  
388 4.7% decrease for PC2; a 12.9% increase for proximity to plant nurseries; a 5.5% increase for  
389 proximity to tire shops; a 1.5% decrease for population density; a 11.6% decrease for proximity  
390 to rivers/ravines; a 36% increase for tree density; a 635% increase for average temperature; a  
391 26.6% increase for days with maximum temp. > 32 °C; a 139% increase for relative humidity  
392 range; a 45.8% decrease for total rainfall; a 16.8% decrease for total rain days; a 76.4% increase  
393 for cool days; and a 73.6% decrease for warm days when adjusted for other variables. The  
394 results will be further explained in the discussion.

395

396

397

398  
399  
400  
401  
402  
403  
404  
405

**Table 6: ST-CAR Model Results (Model 1 – no lags); (Model 2 – lagged weather variables)**

|             | Model 1 – DIC: 67,055.98 |               |         |        | Model 2 – DIC: 66,954.16 |               |         |        |
|-------------|--------------------------|---------------|---------|--------|--------------------------|---------------|---------|--------|
|             | 2.50%                    | Median        | 97.50%  | RR (%) | 2.50%                    | Median        | 97.50%  | RR (%) |
| Intercept   | -2.0296                  | -1.6427       | -1.3183 | NA     | -0.8195                  | -0.5423       | -0.3055 | NA     |
| PC1         | 0.0159                   | 0.0463        | 0.0785  | 4.7    | 0.0459                   | 0.0732        | 0.1     | 7.6    |
| PC2         | -0.0885                  | -0.0475       | -0.0068 | -4.6   | -0.0042                  | 0.0382        | 0.0798  | 3.9    |
| Pnurseries  | 0.0203                   | 0.1213        | 0.2215  | 12.9   | 0.0841                   | 0.1806        | 0.2787  | 19.8   |
| Tires       | -0.0838                  | 0.0531        | 0.1902  | 5.5    | -0.023                   | 0.1118        | 0.2469  | 11.8   |
| Popdens     | -0.173                   | -0.0146       | 0.1482  | -1.5   | -0.3296                  | -0.1749       | -0.0176 | -16    |
| Rivers      | -0.2473                  | -0.1233       | -0.0029 | -11.6  | -0.2532                  | -0.1381       | -0.0227 | -12.9  |
| Trees       | 0.1254                   | 0.3071        | 0.4909  | 36     | 0.0901                   | 0.2626        | 0.4404  | 30     |
| Tavg(L5)    | 1.5864                   | 1.9947        | 2.3546  | 635    | -0.6022                  | -0.2908       | 0.0415  | -25.2  |
| DTRMax(L4)  | -0.24                    | 0.2361        | 0.9014  | 26.6   | 0.4579                   | 0.8115        | 1.2709  | 125.1  |
| RelHRng(L3) | 0.4641                   | 0.8713        | 1.342   | 139    | 0.4317                   | 0.615         | 0.8213  | 85     |
| RainT(L3)   | -1.3716                  | -0.613        | 0.003   | -45.8  | -2.8222                  | -2.4343       | -2.0671 | -91.2  |
| RainD(L5)   | -0.5249                  | -0.1837       | 0.1929  | -16.8  | -0.9178                  | -0.7063       | -0.4845 | -50.7  |
| CoolD(L2)   | 0.0013                   | 0.5678        | 1.1938  | 76.4   | -0.8337                  | -0.2914       | 0.1285  | -25.3  |
| WarmD(L5)   | -1.7085                  | -1.3392       | -0.9888 | -73.8  | 0.2861                   | 0.6383        | 0.9196  | 89.3   |
| $\rho$      | 0.977                    | <b>0.9829</b> | 0.9872  | NA     | 0.977                    | <b>0.9824</b> | 0.9867  | NA     |

|          |        |               |        |    |        |               |        |    |
|----------|--------|---------------|--------|----|--------|---------------|--------|----|
| $\alpha$ | 0.0736 | <b>0.1189</b> | 0.1636 | NA | 0.0737 | <b>0.1193</b> | 0.1651 | NA |
|----------|--------|---------------|--------|----|--------|---------------|--------|----|

406

407 3.1.2 Model 2

408 Table 6 (right) summarizes the results of Model 2. The 95% credible intervals do not  
 409 contain a value of 0, indicating that all the covariates exhibit influential relationships with DENF  
 410 risk at the neighborhood level in Cali between January 2015 and December 2016. The spatial  
 411 autocorrelation value of 0.98 indicates that there is very strong spatial dependence of the data  
 412 after adjusting for covariate effects. The temporal autocorrelation value of 0.11 suggests that  
 413 there is some presence of temporal dependence of the data after adjusting for covariate effects.  
 414 Therefore, DENF risk in Cali at the neighborhood level is influenced by DENF rates and  
 415 covariates in surrounding neighborhoods and time periods (weeks). The DIC (66,964.16) is  
 416 slightly lower than Model 1 (DENF with no lags – DIC = 67,055.98). In general, the lagged  
 417 weather variables in Model 2 shrunk the confidence intervals of the coefficients (most notably  
 418 for average temperature and Days Temp Max); which decreases the uncertainty of our model’s  
 419 risk estimates.

420 Table 6 (right) also shows relative risk estimates of DENF in Cali between January 2015  
 421 and December 2016. The results suggest a 7.6% increase in DENF risk for PC1; a 3.9% increase  
 422 for PC2 (negative relationship [decreased risk] in Model 1); a 19.8% increase for proximity to  
 423 plant nurseries; a 11.8% increase for proximity to tire shops; a -16% decrease for population  
 424 density; a 12.9% decrease for proximity to rivers/ravines; a 30% increase for tree density; a  
 425 25.2% decrease for average temperature; a 125.1% increase for days with maximum temp. > 32  
 426 °C; an 85% increase for relative humidity range; a 91.2% decrease for total rainfall; a 50.7%  
 427 decrease for total rain days; a 25.3% decrease for cool days; and a 89.3% increase for warm  
 428 days. The negative to positive relationship between DENF and PC2 observed when comparing

429 Models 1 and 2 is difficult to interpret. This could be due to the lagged weather variables  
430 affecting the posterior estimates. The magnitude of PC2 (low RR) is much lower than the other  
431 independent variables, therefore, we hypothesize that people that spend more time at home (PC2)  
432 may or may not be more susceptible to DENF and further investigation is required.

433

### 434 3.1.3 Mapping the posterior estimates of DENF

435 Figure 3 provides maps of the temporal cross-sections of Model 2 posterior values for  
436 each neighborhood of DENF rates (per, 1,000) in Cali between 2015 and 2016. The weekly  
437 estimates were aggregated by month for visualization purposes – January 2015, July 2015,  
438 December 2015, January 2016, July 2016, and December 2016, respectively.

439 **[Insert] Figure 3. Temporal cross-sections of model 2 posterior values for each**  
440 **neighborhood of DENF rate (per 1,000) in Cali.**

441 When comparing the six temporal cross-sections, July 2016 experienced the highest  
442 DENF risk (estimated posterior mean values) after accounting for the 14 covariates (including  
443 the lagged weather variables). Interestingly, some locations with high rates of DENF are  
444 classified as middle (3 or 4) or high strata (5 or 6). These middle and high strata neighborhoods  
445 are adjacent to low strata neighborhoods (1 or 2), which suggests that there is spatial-temporal  
446 dependence between them. In other words, there is evidence that middle and high strata  
447 neighborhoods are at higher risk when surrounded by lower strata neighborhoods after  
448 accounting for the covariates in the models. Some of the highest proportion of cases were  
449 observed in the eastern portions of Cali (now shown here), but also include some of the highest  
450 and most densely populated neighborhoods of the city. After computing rates per 1,000 persons  
451 (Figure 3), the eastern portions of Cali (which include some of the poorest neighborhoods) have  
452 lower reported rates of DENF than central, southern, and western regions of Cali.



## 453 **4. Discussion**

454           This study is the first of its kind to model space-time risk at the neighborhood- and  
455 weekly- levels of DENF across two years of disease surveillance data; while also incorporating  
456 temporally lagged weather variables in a ST-CAR approach. Coupling the lagged weather  
457 variables with the spatial covariates of DENF risk, the models include neighborhood-level  
458 effects explaining where and why certain locations are more at-risk than others. A quintessential  
459 spatiotemporal model decomposes the variability in the outcome in large scale variations (the  
460 mean function) and small-scale variation (the spatiotemporal random effects)<sup>22</sup>. Independent  
461 variables were used to characterize large-scale variations, while spatiotemporal autocorrelation  
462 was used to characterize small-scale variations. The lagged independent variables modified the  
463 large-scale variations and for this data it seems they have no effect on small scale variations. The  
464 predictive power of the models remains the same, very close DIC values (see Table 6). That is  
465 why we are seeing quite robust estimates of spatial autocorrelation parameters in both models.  
466 There are many key findings that warrant further investigation and explanation.

### 467 4.1 Influence of Socioeconomic and Environmental Factors

468           First, there is very strong evidence that there is both spatial and temporal dependence  
469 between DENF risk and the significant covariates for adjacent neighborhoods in Cali. Although  
470 DENF had a much lower temporal autocorrelation (value of 0.11 for both Models 1 and 2), this  
471 can be explained by the distribution of cases between 2015 and 2016 – there were three distinct  
472 peaks, but DENF remains a persistent threat due to the four serotypes of the virus. The very  
473 strong spatial autocorrelation values (although extremely high) for DENF suggest that outbreaks  
474 in adjacent neighborhoods are strongly related (i.e. living next to a neighborhood with high cases  
475 will strongly influence DENF risk and cases in your neighborhood of residence).

476           When examining the results of the three socioeconomic covariates (PC1, PC2, and  
477 population density), the increased risk of DENF for PC1 is an interesting finding. This  
478 corroborates with Delmelle et al. (2016)<sup>30</sup>, who suggest that in the southern part of Cali, houses  
479 are typically bigger with relatively larger yards, which may provide a suitable habitat for *Aedes*  
480 to breed. Neighborhoods with a high proportion of people in the PC1 category (e.g. employed,  
481 older, more educated) are also typically adjacent to middle or lower strata neighborhoods (with  
482 the exception of the extreme South), which also may increase the risk of disease due to the very  
483 strong evidence of space-time dependence between the locations, as suggested by the models.  
484 An increased risk of DENF was reported for neighborhoods with higher proportion of  
485 individuals in the PC2 category (i.e. work from home and students). This finding corroborates  
486 with strong evidence that *Aedes* proliferates in and around homes<sup>57,58,59</sup>; and it has also been  
487 found that cases can substantially decline if *Aedes* trap interventions are put in place in at-risk  
488 communities<sup>60</sup>.

489           Another unexpected result was the negative relationship between population density and  
490 DENF. One explanation can be that some of the densely populated neighborhoods in the eastern  
491 part of Cali have a high concentration of Afro-Colombian population, which has been suggested  
492 to be less susceptible to the viruses<sup>61,62</sup>. Furthermore, there is evidence that shows that low  
493 density areas with poor infrastructure may have increased *Aedes* presence<sup>63</sup> and DENF's  
494 complex immunology and the herd immunity resulting after infection from the viruses<sup>64</sup> may  
495 have contributed to these patterns. Amongst other factors, high density of populations may not  
496 necessarily be a main risk factor of VBD transmission<sup>65</sup>. While increases in population and  
497 urbanization will undoubtedly increase risk of VBD transmission, the true effect of population  
498 density may vary at fine spatial levels (e.g. neighborhoods). Public health authorities typically

499 carry out fumigation and education programs in neighborhoods with higher population densities,  
500 which may result in a lack of targeted interventions in less dense areas with *Aedes* populations  
501 (e.g. sewers, green areas, etc.). Vector control efforts in Cali include storm sewer control,  
502 spraying, use of guppy fish, visits to health facilities and homes, and community educational  
503 campaigns<sup>35</sup>.

504 Closer proximity to plant nurseries, tire shops, and higher tree density all exhibited an  
505 increased risk of DENF. Plant nurseries and tire shops are common breeding grounds of *Aedes*,  
506 thus neighborhoods within close proximity are generally at a higher risk of disease transmission.  
507 Tree density may also be a significant risk factor of *Aedes* presence since studies have shown  
508 that high tree shade density stimulates breeding; and tree holes are suitable water containers  
509 where *Aedes* have been found in abundance<sup>67,68</sup>.

510 Closer proximity to rivers and ravines (i.e. any moving bodies of water) resulted in  
511 significantly lower risk of DENF. *Aedes* require stagnant water as a breeding ground, therefore,  
512 the flowing water of a river or ravine would prove to be an unsuitable habitat for the mosquitoes.  
513 Although flooding events during the rainy season could create stagnant water sources  
514 surrounding the rivers, however, floods may also act as a disruptive force on *Aedes* habitat by  
515 flushing out their breeding sites and eggs<sup>69,70</sup>. Further research using remote sensing techniques  
516 (such as flow analysis) could provide insight to areas prone to stagnant water.

#### 517 4.2 Influence of Weather Factors

518 In general, the use of optimally lagged weather variables shrunk the confidence intervals  
519 about the mean model coefficients and relative risk estimates. Specifically, the individual  
520 relationships between each lagged weather covariate and disease risk became either consistently  
521 positive or consistently negative (except for average temperature). Moreover, since the optimal

522 lags were different among the weather covariates, our results imply that individual covariates  
523 impact different stages of the vector lifecycle (see Table 5). Given that such relationships could  
524 inform future space-time modeling and mitigation efforts, the most likely physical connections  
525 between local weather conditions and the *Aedes* lifecycle (Tables 4 and 5) are discussed in  
526 greater detail based on our Model-2 results (Table 6).

527         Variables with an optimal 5-week lag (Tavg, DTRmax, RainD, WarmD) are most  
528 influential on larval development. Both DTRmax and WarmD exhibit the expected positive  
529 relationship (Table 5) and large predictive importance based on relative risk estimations (Table  
530 6), while RainD exhibits the expected negative relationship with moderate importance. Despite  
531 Tavg having an unexpected negative relationship with DENF, its predictive importance is  
532 relatively small. Five weeks before above-average DENF rates, the weather is often  
533 characterized by multiple days with short-lived rain showers (RainD is above average, its  
534 correlation with DENF is negative, and the regression coefficient is negative), yet each day  
535 experiences sufficient sunshine to allow the daily maximum temperature to exceed 32°C  
536 (WarmD is above average, its correlation with DENF is positive, and the regression coefficient is  
537 positive).

538         The short-lived rain showers also induce evaporative cooling that lowers the daily  
539 minimum temperature and increases the daily temperature range (DTRmax is above average, its  
540 correlation with DENF is positive, and the regression coefficient is positive), leading to slightly  
541 cooler, but above-average daily mean temperatures (Tavg remains above average, its correlation  
542 with DENF remains positive, but the regression coefficient is slightly negative and the relative  
543 risk is small). Overall, regular rainfall combined with average to above-average temperatures

544 produce numerous stagnant pools within a favorable thermal environment for prolific larval  
545 development.

546 Variables with an optimal 3-week lag (RainT and RHrng) are most influential on the  
547 gonotrophic cycle. Both RainT and RHrng exhibit the expected relationships (Table 5) with  
548 similar moderate levels of predictive importance (Table 6). Weather conditions three weeks prior  
549 to above-average DENF rates are often characterized by minimal rainfall (RainT is below  
550 average, its correlation with DENF is negative, and the regression coefficient is negative) and  
551 clear skies, which allows the relative humidity to fluctuate between small daytime values and  
552 large nighttime values (RHrng is above average, its correlation with DENF is positive, and the  
553 regression coefficient is positive). Overall, the relatively dry conditions maximize solar heating,  
554 minimize evaporative cooling, and promote the warm temperatures most favorable for *Aedes*  
555 feeding.

556 Finally, variables with an optimal 2-week lag (CoolD) are most influential on the  
557 gonotrophic cycle and extrinsic incubation. Specifically, CoolD exhibits the expected negative  
558 relationship (Table 5), but its relative importance is small and roughly equivalent to Tavg.  
559 Weather conditions two weeks before above-average DENF rates often exhibit above-average  
560 temperatures (CoolD is below average, its correlation with DENF is negative, and the regression  
561 coefficient is negative); whereby, the warmer temperatures will accelerate both vector feeding  
562 and viral replication within the vector, which increases the potential for transmission to humans.

563 Overall, such consistent multi-lag relationships reinforce the idea that DENF outbreak  
564 dynamics are dependent on a complex combination of weather conditions 2-5 weeks prior  
565 (Eastin et al. 2014). Careful monitoring of weather conditions within this time window could  
566 optimally inform any sub-seasonal DENF mitigation efforts. Moreover, it should be noted that a

567 moderate El Niño occurred during our 2015-2016 study period<sup>71</sup> and there is strong evidence that  
568 major DENF epidemics are more severe during El Nino events<sup>20,72</sup>. Therefore, any sub-seasonal  
569 mitigation efforts should also account for inter-seasonal climate variability.

#### 570 4.3 Limitations

571 Despite the strengths and contributions of this research, there are notable limitations and  
572 areas of future work that is worth discussing. First, the underreporting of cases and unmatched  
573 addresses during the geocoding process likely undermines the true burden of DENF.  
574 Underreporting is also a major issue in the low strata neighborhoods and also not uniform across  
575 the city, while surveillance systems can improve the identification of risk factors throughout the  
576 city<sup>73</sup>. Second, the socioeconomic and demographic data was a mix from the Colombian  
577 National Census and 2010 population estimates. Colombia recently administered a new national  
578 census (the first since 2005) but is currently unavailable. Using 2005 and 2010 data for this study  
579 will bias the results, but the neighborhood classifications (strata) mostly remained unchanged.  
580 The uncertainty resulting from using outdated census data is a common limitation found in many  
581 studies in Latin America and developing countries. Several articles examining patterns of  
582 dengue fever in Colombia have recognized outdated population census being a critical issue that  
583 could affect the findings of their research<sup>74-79</sup>. Until more recent census are available, different  
584 population growth models could address this issue, or relying on disaggregated population  
585 projection, using dasymetric mapping<sup>80,81</sup>. Third, including vector surveillance data  
586 (presence/absence) in each neighborhood would improve the accuracy of the relative risk  
587 estimates<sup>17</sup>. Fourth, the spatial weight matrix only considered adjacent neighborhoods as  
588 “neighbors”, we recognize that individual activity spaces expand far beyond locations nearby  
589 their home. Future research can implement different spatial and temporal weight matrices for

590 sensitivity analysis purposes. Fifth, the weather conditions and severity of outbreaks for DENF  
591 varied between 2015 and 2016, which may have affected the model results. Future work can  
592 disaggregate the years and run two separate models for further examination. Sixth, the space-  
593 time patterns of the DENF outbreaks did not exhibit much seasonality, which is likely due to  
594 only using two years of data. Further work can utilize 5-10 years of DENF and weather data to  
595 detect potential seasonal patterns of the epidemics. Finally, weather variability is represented by  
596 a single weather station (and thus limited to the temporal domain). Future work would benefit  
597 from multiple weather stations that can document spatial variability across the region.

#### 598 4.4 Opportunities

599 Chikungunya (CHIK) and Zika are transmitted by the same vector (*Aedes*), and further  
600 investigation can develop a multivariate space-time CAR model to examine which  
601 neighborhoods are at higher risk for one disease, two diseases, or all three concurrently.  
602 Multivariate space-time (MVST) approach in CAR modeling is still in its infancy stages<sup>24</sup> and  
603 the development of such models can more accurately examine and compare the co-occurrence of  
604 diseases transmitted by the same vector. A long-term goal is to develop a multi-parameter early  
605 warning system (EWS) that informs public health officials and motivates effective vector  
606 surveillance and control measures. The space-time models and methods described herein  
607 represent progress toward that goal. However, effective EWS development would require larger  
608 and more comprehensive databases (for both robust model development and independent  
609 validation) than those currently available. As noted above, an EWS system would benefit from  
610 longitudinal information regarding socioeconomic, demographic, and environmental variables  
611 combined with spatial information regarding weather variability across the region.

## 612 5. Conclusion

613 A ST-CAR modeling approach was utilized to examine significant socioeconomic,  
614 demographic, environmental, and meteorological risk variable of DENF in Cali, Colombia  
615 during 2015 and 2016. The temporally lagged weather covariates can significantly estimate  
616 when risk of transmission is highest, and the spatial covariates can help explain the differences in  
617 disease risk at the neighborhood-level. Adding weather and climate data to a space-time model  
618 can improve disease surveillance, especially for VBDs that require specific conditions for  
619 transmission to occur. This study demonstrated that there was strong spatial and temporal  
620 dependence between adjacent neighborhoods and time periods, which provides strong evidence  
621 that DENF transmission are influenced by characteristics and phenomena occurring in  
622 surrounding locations. We also provide evidence that DENF is not just a disease of the poor;  
623 although risk factors may be higher in neighborhoods of lower socioeconomic status, we have  
624 shown that the transmission dynamics of DENF are place- and temporally based. Despite this  
625 study being retrospective in nature, the modeling approach can be applied in a contemporary  
626 surveillance setting when significant outbreaks have not yet occurred, highlighting at-risk areas  
627 to help promote proactive community health, improve public health educational campaigns,  
628 targeted interventions. We hope that this research influences further small area space-time  
629 analysis, since we support the notion that disease prevention (in general) should start at the  
630 neighborhood and community level.

## 631 **Acknowledgements**

632 The authors would like to thank the editor and anonymous reviewers for their constructive  
633 feedback that ultimately improved the quality of this paper.

## 634 **References**

635 1. World Health Organization, 2014. "WHO Factsheet Vector-Borne Diseases." Factsheet



- 636 Number 387, no. March: 10. Available at:  
637 [http://www.who.int/kobe\\_centre/mediacentre/vbdfactsheet.pdf](http://www.who.int/kobe_centre/mediacentre/vbdfactsheet.pdf). Accessed December 2,  
638 2019.  
639
- 640 2. Unitaid, 2017. Health experts call for new tools to tackle vector-borne diseases. Available at:  
641 [https://unitaid.org/news-blog/health-experts-call-new-tools-tackle-vector-borne-](https://unitaid.org/news-blog/health-experts-call-new-tools-tackle-vector-borne-diseases/#en)  
642 [diseases/#en](https://unitaid.org/news-blog/health-experts-call-new-tools-tackle-vector-borne-diseases/#en). Accessed May 13, 2020.  
643
- 644 3. Wang H, et al., 2016. Global, Regional, and National Life Expectancy, All-Cause Mortality,  
645 and Cause-Specific Mortality for 249 Causes of Death, 1980-2015: A Systematic Analysis  
646 for the Global Burden of Disease Study 2015. *The Lancet* 388 (10053): 1459–1544.  
647
- 648 4. Bhatt S, et al., 2013. The global distribution and burden of dengue. *Nature* 496 (7446): 504-  
649 507.  
650
- 651 5. Paupy C, et al., 2010. Comparative role of *Aedes albopictus* and *Aedes aegypti* in the  
652 emergence of Dengue and Chikungunya in central Africa. *Vector-Borne and Zoonotic*  
653 *Diseases* 10(3): 259-266.  
654
- 655 6. Gratz NG, 2004. Critical review of the vector status of *Aedes albopictus*. *Medical and*  
656 *veterinary entomology* 18(3): 215-227.  
657
- 658 7. Powell JR, Tabachnick WJ, 2013. History of domestication and spread of *Aedes aegypti*-A  
659 Review. *Memorias do Instituto Oswaldo Cruz* 108: 11-17.  
660
- 661 8. Mustafa MS, Rasotgi V, Jain S, Gupta V, 2015. Discovery of fifth serotype of dengue virus  
662 (DENV-5): A new public health dilemma in dengue control. *Medical Journal Armed*  
663 *Forces India* 71(1): 67-70.  
664
- 665 9. World Health Organization, 2018. Dengue and severe dengue. Available at:  
666 <http://www.who.int/newsroom/fact-sheets/detail/dengue-and-severe-dengue>. Accessed  
667 September 28, 2019.  
668
- 669 10. World Health Organization, 2011. Comprehensive guideline for prevention and control of  
670 dengue and dengue haemorrhagic fever. Available at:  
671 <https://apps.who.int/iris/handle/10665/204894>. Accessed January 29, 2020.  
672
- 673 11. Gubler DJ, 1998. Dengue and dengue hemorrhagic fever. *Clinical microbiology reviews*  
674 11(3): 480-496.  
675
- 676 12. Toan NT, Rossi S, Prisco G, Nante N, Viviani S, 2015. Dengue epidemiology in selected  
677 endemic countries: factors influencing expansion factors as estimates of  
678 underreporting. *Tropical Medicine & International Health* 20(7) 840-863.  
679
- 680 13. Shepard DS, Undurraga EA, Halasa YA, Stanaway JD, 2016. The global economic burden of  
681 dengue: a systematic analysis. *The Lancet infectious diseases* 16(8): 935-941.

- 682  
683 14. Desjardins MR., Whiteman A, Casas I, Delmelle E, 2018. Space-time clusters and  
684 occurrence of chikungunya and dengue fever in Colombia from 2015 to 2016. *Acta*  
685 *tropica* 185: 77-85.  
686  
687 15. Kirby RS, Delmelle E, Eberth JM, 2017. Advances in spatial epidemiology and geographic  
688 information systems. *Annals of epidemiology* 27(1): 1-9.  
689  
690 16. Auchincloss AH, Gebreab SY, Mair C, Diez Roux AV, 2012. A review of spatial methods in  
691 epidemiology, 2000–2010. *Annual review of public health* 33: 107-122.  
692  
693 17. Whiteman A, 2018. Socioeconomic Variation and Aedes Mosquitoes: An Examination of  
694 Vector-Borne Disease Risk in the Urban Environment (doctoral dissertation, The  
695 University of North Carolina at Charlotte).  
696  
697 18. Bates I, et al, 2004a. Vulnerability to malaria, tuberculosis, and HIV/AIDS infection and  
698 disease. Part 1: determinants operating at individual and household level. *The Lancet*  
699 *infectious diseases* 4(5): 267-277.  
700  
701 19. ———, 2004b. Vulnerability to malaria, tuberculosis, and HIV/AIDS infection and disease.  
702 Part II: determinants operating at environmental and institutional level. *The Lancet*  
703 *infectious diseases* 4(6): 368-375.  
704  
705 20. Eastin MD, Delmelle E, Casas I, Wexler J, Self C, 2014. Intra-and interseasonal  
706 autoregressive prediction of dengue outbreaks using local weather and regional climate  
707 for a tropical environment in Colombia. *The American journal of tropical medicine and*  
708 *hygiene* 91(3): 598-610.  
709  
710 21. Semenza JC, Suk JE, Estevez V, Ebi KL, Lindgren E, 2012. Mapping climate change  
711 vulnerabilities to infectious diseases in Europe. *Environmental health perspectives*  
712 120(3): 385.  
713  
714 22. Cressie N, Wikle CK, 2015. *Statistics for spatio-temporal data*. John Wiley & Sons.  
715  
716 23. Wang M, 2018. *Spatio-temporal Statistical Modeling: Climate Impacts due to Bioenergy*  
717 *Crop Expansion* (doctoral dissertation, Arizona State University).  
718  
719 24. Lee D, Rushworth A, Napier G, 2018. Spatio-temporal areal unit modelling in R with  
720 conditional autoregressive priors using the CARBayesST package. *Journal of Statistical*  
721 *Software* 84(9): 1-39.  
722  
723 25. Freisthler B, Weiss RE, 2008. Using Bayesian space-time models to understand the  
724 substance use environment and risk for being referred to child protective  
725 services. *Substance Use & Misuse* 43(2): 239-251.  
726  
727 26. Lawson AB, 2013. *Statistical methods in spatial epidemiology*. John Wiley & Sons.

- 728  
729 27. Sani A, Abapihi B, Mukhsar M, Kadir K, 2015. Relative risk analysis of dengue cases using  
730 convolution extended into spatio-temporal model. *Journal of Applied Statistics* 42(11):  
731 2509-2519.  
732
- 733 28. Mukhsar, Sani A, Abapihi B, Cahyono E, 2016a. Construction Posterior Distribution for  
734 Bayesian Mixed ZIP Spatio-Temporal Model. *International Journal of Biology and*  
735 *Biomedicine* 1: 32-39.  
736
- 737 29. Mukhsar, Abapihi B, Sani A, Cahyono E, Adam P, Aini Abdullah F, 2016b. Extended  
738 convolution model to bayesian spatio-temporal for diagnosing the DHF endemic  
739 locations. *Journal of Interdisciplinary Mathematics* 19(2): 233-244.  
740
- 741 30. Delmelle E, Hagenlocher M, Kienberger S, Casas I, 2016. A spatial model of socioeconomic  
742 and environmental determinants of dengue fever in Cali, Colombia. *Acta tropica* 164:  
743 169-176.  
744
- 745 31. Gharbi M, Quenel P, Gustave J, Cassadou S, La Ruche G, Girdary L, Marrama L, 2011.  
746 Time series analysis of dengue incidence in Guadeloupe, French West Indies: forecasting  
747 models using climate variables as predictors. *BMC Infectious Diseases* 11: 1–13.  
748
- 749 32. Barrera R, Amador M, MacKay AJ, 2011. Population dynamics of *Aedes aegypti* and  
750 dengue as influenced by weather and human behavior in San Juan, Puerto Rico. *PLoS*  
751 *Neglected Tropical Diseases* 5: e1378.  
752
- 753 33. Gonzalez R, Suarez MF. 1995. Sewers—the principal *Aedes aegypti* breeding sites in Cali,  
754 Colombia. *American Journal of Tropical Medicine and Hygiene* 53: 160.  
755
- 756 34. Kelly-Hope LA, Purdie DM, Kay BH. 2004. Ross River virus disease in Australia, 1886-  
757 1998, with analysis of risk factors associated with outbreaks. *Journal of Medical*  
758 *Entomology* 41: 133-150.  
759
- 760 35. Woodruff RE, Guest CS, Garner MG, Becker N, Lindesay J, Carvan T, Ebi K. 2002.  
761 Predicting Ross River virus epidemics from regional weather data. *Epidemiology* 13:  
762 384-393.  
763
- 764 36. Ellis AM, Garcia AJ, Focks DA, Morrison AC, Scott TW. 2011. Parameterization and  
765 sensitivity analysis of a complex simulation model for mosquito population dynamics,  
766 dengue transmission, and their control. *American Journal of Tropical Medicine and*  
767 *Hygiene* 85: 257–264.  
768
- 769 37. Tun-Lin W, Burkot TR, Kay BH. 2000. Effects of temperature and larval diet on  
770 development rates and survival of the dengue vector *Aedes aegypti* in north Queensland,  
771 Australia. *Medical Veterinary Entomology* 14: 31-37.  
772
- 773 38. Rueda LM, Patel KJ, Axtell RC, Stinner RE. 1990. Temperature dependent development and

- 774 survival rates of *Culex quinquefasciatus* and *Aedes aegypti*. *Journal of Medical*  
775 *Entomology* 27: 892–898.  
776
- 777 39. Thu HM, Aye KM, Thein S. 1998. The effect of temperature and humidity on dengue virus  
778 propagation in *Aedes aegypti* mosquitos. *Southeast Asian Journal of Tropical Medicine*  
779 *and Public Health* 29: 280-284.  
780
- 781 40. Azil AH, Long SA, Ritchie SA, Williams CR. 2010. The development of predictive tools for  
782 pre-emptive dengue vector control: A study of *Aedes aegypti* abundance and  
783 meteorological variables in North Queensland, Australia. *Tropical Medicine and*  
784 *International Health* 15: 1190–1197.  
785
- 786 41. Fouque F, Carinci R, Gaborit P, Issaly J, Bicout DJ, Sabatier P. 2006. *Aedes aegypti* survival  
787 and dengue transmission patterns in French Guiana. *Journal of Vector Ecology* 31: 390–  
788 399.  
789
- 790 42. Yang HM, Marcoris MLG, Galvani KC, Andrighetti MTM, Wanderley DMV. 2009.  
791 Assessing the effects of temperature on the population of *Aedes aegypti* – the vector of  
792 dengue. *Epidemiology Infection* 137: 1188–1202.  
793
- 794 43. Scott TW, Amerasinghe PH, Morrison AC, Lorenz LH, Clark GG, Strickman D, Kittayapong  
795 P, Edman JD. 2000. Longitudinal studies of *Aedes aegypti* in Thailand and Puerto Rico:  
796 Blood feeding frequency. *Journal of Medical Entomology* 37: 89-101.  
797
- 798 44. Lambrechts L, Paaijmans KP, Fansiri T, Carrington LB, Kramer LD, Thomas MB, Scott TW.  
799 2011. Impact of daily temperature fluctuations on dengue viral transmission by *Aedes*  
800 *aegypti*. *Proceedings of the National Academy of Sciences USA* 108: 7460–7465.  
801
- 802 45. Watts DM, Burke DS, Harrison BA, Whitmore RE, Nisalak A. 1987. Effect of temperature  
803 on the vector efficiency of *Aedes aegypti* for dengue-2 virus. *American Journal of*  
804 *Tropical Medicine and Hygiene* 36: 143–152.  
805
- 806 46. Reiter P. 2001. Climate change and mosquito-borne disease. *Environmental Health*  
807 *Perspectives* 109: 141–161.  
808
- 809 47. Jetten TH, Focks DA. 1997. Potential changes in the distribution of dengue transmission  
810 under climate warming. *American Journal of Tropical Medicine and Hygiene* 57: 285–  
811 297.  
812
- 813 48. Fotheringham AS, Charlton ME, Brunson C, 1998. Geographically weighted regression: a  
814 natural evolution of the expansion method for spatial data analysis. *Environment and*  
815 *planning A* 30(11): 1905-1927.  
816
- 817 49. Fotheringham AS, Crespo R, Yao J, 2015. Geographical and temporal weighted regression  
818 (GTWR). *Geographical Analysis* 47(4): 431-452.  
819

- 820 50. City of Cali. 2020. Estratificación Socioeconómica de Santiago de Cali. Available at:  
821 [https://www.cali.gov.co/planeacion/publicaciones/107322/estratificacion-](https://www.cali.gov.co/planeacion/publicaciones/107322/estratificacion-socioeconomica-de-santiago-de-cali/)  
822 [socioeconomica-de-santiago-de-cali/](https://www.cali.gov.co/planeacion/publicaciones/107322/estratificacion-socioeconomica-de-santiago-de-cali/). Accessed May 7, 2020.  
823
- 824 51. Menne MJ, Durre I, Vose RS, Gleason BE, Houston TG, 2012. An overview of the global  
825 historical climatology network-daily database. *Journal of Atmospheric and Oceanic*  
826 *Technology* 29(7): 897-910.  
827
- 828 52. O'Brien RM. 2007. A caution regarding rules of thumb for variance inflation factors.  
829 *Quality & quantity* 41(5): 673-690.  
830
- 831 53. Wold S, Esbensen K, Geladi P. 1987. Principal component analysis. *Chemometrics*  
832 *and intelligent laboratory systems* 2(1-3): 37-52.  
833
- 834 54. Moran PA, 1950. Notes on continuous stochastic phenomena. *Biometrika* 37(1/2): 17-23.  
835
- 836 55. Rushworth A, Lee D, Mitchell R, 2014. A spatio-temporal model for estimating the long-  
837 term effects of air pollution on respiratory hospital admissions in Greater London. *Spatial*  
838 *and spatio-temporal epidemiology* 10: 29-38.  
839
- 840 56. Robert C, & Casella G, 2013. Monte Carlo statistical methods. Springer Science & Business  
841 Media.  
842
- 843 57. Baldacchino F, Caputo B, Chandre F, Drago A, della Torre A, Montarsi F, Rizzoli A, 2015.  
844 Control methods against invasive *Aedes* mosquitoes in Europe: a review. *Pest*  
845 *management science* 71(11): 1471-1485.  
846
- 847 58. Lindsay SW, Wilson A, Golding N, Scott TW, Takken W, 2017. Improving the built  
848 environment in urban areas to control *Aedes aegypti*-borne diseases. *Bulletin of the*  
849 *World Health Organization* 95(8): 607.  
850
- 851 59. Wilson JJ, Sevarkodiyone SP, 2017. Household survey of dengue and chikungunya vectors  
852 (*Aedes aegypti* and *Aedes albopictus*) (Diptera: Culicidae) in Tirunelveli district, Tamil  
853 Nadu, India. *Journal of Entomological Research* 41(3): 317-324.  
854
- 855 60. Lorenzi OD, 2016. Reduced incidence of Chikungunya virus infection in communities with  
856 ongoing *Aedes Aegypti* mosquito trap intervention studies—Salinas and Guayama,  
857 Puerto Rico, November 2015–February 2016. *MMWR Morb Mortal Wkly* 65.  
858
- 859 61. Rojas, J.H. 2011. Dengue y dengue grave”, *Boletines Unidad de Epidemiología, Santiago*  
860 *de Cali*. Available from:  
861 [http://calisaludable.cali.gov.co/saludPublica/2013\\_Dengue/revista%20dengue\\_dengue\\_gr](http://calisaludable.cali.gov.co/saludPublica/2013_Dengue/revista%20dengue_dengue_grave.pdf)  
862 [ave.pdf](http://calisaludable.cali.gov.co/saludPublica/2013_Dengue/revista%20dengue_dengue_grave.pdf). Accessed May 7, 2020.  
863

- 864 62. Chacón-Duque JC, et al., 2014. African genetic ancestry is associated with a protective effect  
865 on dengue severity in colombian populations. *Infection, Genetics and Evolution* 27: 89-  
866 95.  
867
- 868 63. Maciel-de-Freitas R, Lourenço-de-Oliveira R, 2009. Presumed unconstrained dispersal of  
869 *Aedes aegypti* in the city of Rio de Janeiro, Brazil. *Revista de saude publica* 43: 8-12.  
870
- 871 64. Schmidt WP, et al., 2011. Population density, water supply, and the risk of dengue fever in  
872 Vietnam: cohort study and spatial analysis. *PLoS medicine* 8(8): e1001082.  
873
- 874 65. Feldstein LR, Brownstein JS, Brady OJ, Hay SI, Johansson MA, 2015. Dengue on islands: a  
875 Bayesian approach to understanding the global ecology of dengue viruses. *Transactions*  
876 *of the Royal Society of Tropical Medicine and Hygiene* 109(5): 303-312.  
877
- 878 66. City of Cali. 2020. Administración caleña tomará nuevas medidas contra el dengue.  
879 Available from: [https://www.cali.gov.co/salud/publicaciones/151526/administracion-](https://www.cali.gov.co/salud/publicaciones/151526/administracion-calena-tomara-nuevas-medidas-contra-el-dengue/)  
880 [calena-tomara-nuevas-medidas-contra-el-dengue/](https://www.cali.gov.co/salud/publicaciones/151526/administracion-calena-tomara-nuevas-medidas-contra-el-dengue/). Accessed May 7, 2020.  
881
- 882 67. Lian CW, Seng CM, Chai WY, 2006. Spatial, environmental and entomological risk factor  
883 analysis on a rural dengue outbreak in Lundu District in Sarawak, Malaysia. *Trop*  
884 *Biomed* 23(1): 85-96.  
885
- 886 68. Mangudo C, Aparicio JP, Gleiser RM, 2015. Tree holes as larval habitats for *Aedes aegypti*  
887 in urban, suburban and forest habitats in a dengue affected area. *Bulletin of*  
888 *entomological research* 105(6): 679-684.  
889
- 890 69. Benedum, CM, Seidahmed, OME, Eltahir, EAB, Marjuzon, N, 2018. Statistical modeling of  
891 the effect of rainfall flushing on dengue transmission in Singapore. *PLOS Neglected*  
892 *Tropical Diseases* 12 (12).  
893
- 894 70. Duchet, C, Moraru, GM, Segev, O, Spencer, M, Gershberg Hayoon, A, Blaustein, L, 2017.  
895 Effects of flash flooding on mosquito and community dyanmics in experimental pools.  
896 *Journal of Vector Ecology* 42(2): 254-263.  
897
- 898 71. Null J, 2019, El Niño and La Niña Years and Intensities. Available at:  
899 <https://ggweather.com/enso/oni.htm>. Accessed December 10, 2019.  
900
- 901 72. Vincenti-Gonzalez MF, Tami A, Lizarazo EF, Grillet ME, 2018, ENSO-driven climate  
902 variability promotes periodic major outbreaks of dengue in Venezuela. *Scientific reports*  
903 8(1): 5727.  
904
- 905 73. Desjardins MR, Casas I, Victoria AM, Carbonell D, Dávalos DM, EM, Delmelle, 2020.  
906 Knowledge, attitudes, and practices regarding dengue, chikungunya, and Zika in Cali,  
907 Colombia. *Health & Place* 63: 102339.  
908
- 909 74. Adin A, Martínez-Bello DA, López-Quílez A, Ugarte MD, 2018. Two-level

- 910 resolution of relative risk of dengue disease in a hyperendemic city of Colombia. PLOS  
911 One 13(9).  
912
- 913 75. Casas I, Delmelle E., Delmelle EC, 2017. Potential versus revealed access to care  
914 during a dengue fever outbreak. *Journal of Transport & Health* 4: 18-29.  
915
- 916 76. Casas I, Delmelle E, 2019. Landscapes of healthcare utilization during a dengue fever  
917 outbreak in an urban environment of Colombia. *Environmental monitoring and*  
918 *assessment* 191(2): 279.  
919
- 920 77. Fuentes-Vallejo M, 2017. Space and space-time distributions of dengue in a hyper-endemic  
921 urban space: the case of Girardot, Colombia. *BMC infectious diseases* 17(1): 512.  
922
- 923 78. Hagenlocher M, Delmelle E, Casas I, Kienberger S, 2013. Assessing socioeconomic  
924 vulnerability to dengue fever in Cali, Colombia: statistical vs expert-based modeling.  
925 *International journal of health geographics* 12(1): 36.  
926
- 927 79. Hohl A, Delmelle E, Tang W, Casas I, 2016. Accelerating the discovery of space-time  
928 patterns of infectious diseases using parallel computing. *Spatial and spatio-temporal*  
929 *epidemiology* 19: 10-20.  
930
- 931 80. Linard C, Tatem AJ, 2012. Large-scale spatial population databases in infectious disease  
932 research. *International journal of health geographics* 11(1): 7.  
933
- 934 81. Wardrop NA, et al., 2018. Spatially disaggregated population estimates in the absence of  
935 national population and housing census data. *Proceedings of the National Academy of*  
936 *Sciences* 115(14): 3529-3537.

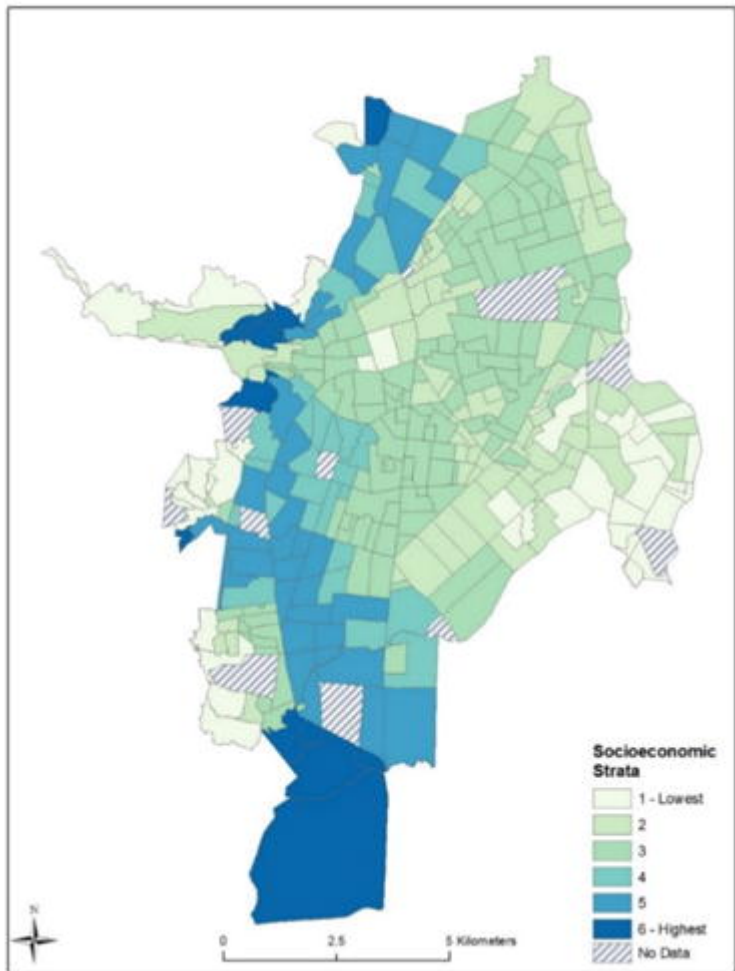



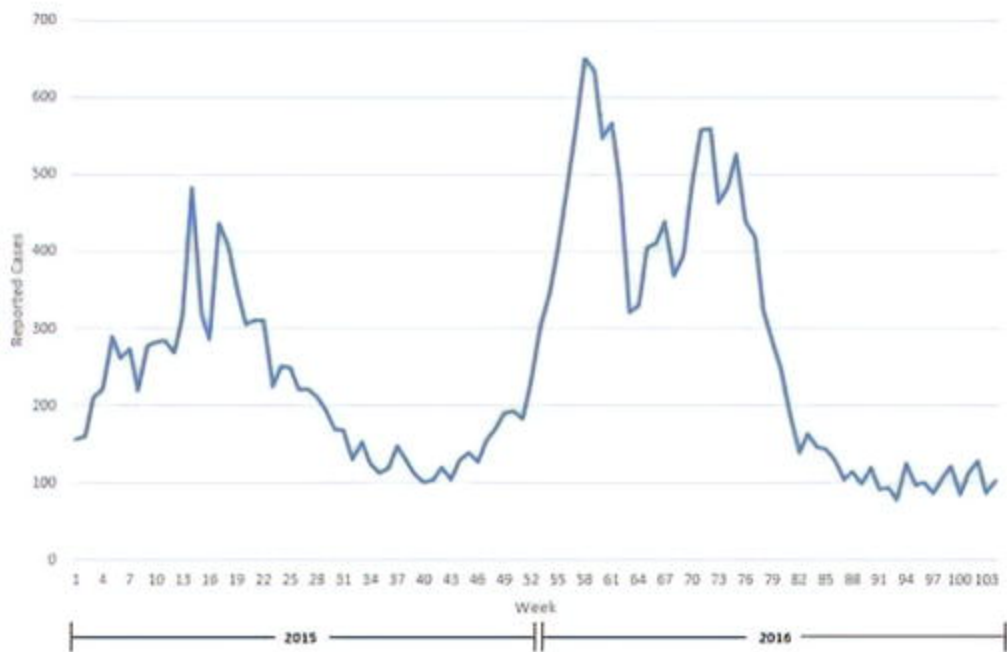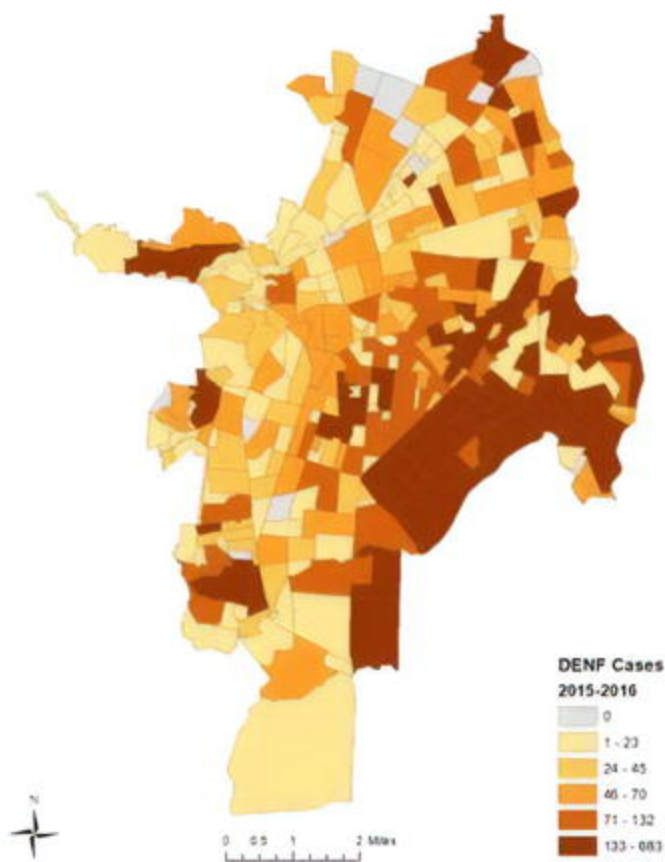

January 2015

July 2015

December 2015

January 2016

July 2016

December 2016

DENF Rates (per 1,000)

Posterior Estimate

0.01 - 1.00

1.01 - 1.62

1.63 - 3.47

3.48 - 6.76

6.77 - 17.21

No population data

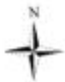

0 2.5 5 10 Kilometers
